# Supplementary material
Source: publisher figshare collection journal article supplement (https://tandf.figshare.com/ndownloader/files/16255739)
Supplement: Supplementary file 1 [file 16255739]

**APPENDIX I: FINAL SURVEY QUESTIONS AND ADDITIONAL DETAILS REGARDING THE SURVEY**

**Final Survey Questions-ended survey questions:**

1. At what age do you consider power mobility as an option for children with mobility deficits/limitations? Please provide a brief rationale for your response. (NOTE: The first part of this question was reported with other quantitative findings from the survey.)
2. What cognitive skills do you consider when making a decision about trialing power mobility use with a child? Please provide a brief rationale for your response.

**Additional Details Regarding the Survey:**

1. Prior to study onset, a draft survey was reviewed by an expert panel (n=10) consisting of pediatric academic faculty members at OT and PT educational programs in Canada and the USA; special educators and clinicians with extensive experience in pediatric power mobility; and researchers experienced in survey development. Panelists were asked to complete the draft survey and respond to open-ended questions regarding wording and clarity of survey questions as well as the completeness of the draft survey. Reviewer suggestions were incorporated into the final survey.
2. Recruitment methods included use of social media (Twitter and Facebook groups for OTs and PTs), professional listservs (pediatric special interest groups (SIGs) of provincial and state professional organizations, the Seating and Mobility SIG of the Rehabilitation Engineering Society of North America, and electronic newsletters of professional organizations in both countries (the American Academy of Pediatric Physical Therapy and the Canadian Physiotherapy Association’s Pediatric Division). Snowball recruitment was also used to e-mail the survey link to key professional contacts who were asked to forward the link to potential respondents.
3. A participation rate for the survey could not be determined due to the recruitment methods used in the study.
4. The survey did not collect any identifiable data (including the IP address)
5. Completion of the survey was entirely voluntary.
6. Respondents were not required to respond to any questions and could skip (not answer) any question in the survey.
7. There were not any incentives for participating in the survey.
8. The survey was open for data collection from September 12, 2017 through December 31, 2017.
9. The questions on the survey were not randomized.
10. Adaptive questioning was used only for questions regarding respondents’ place of practice: respondents indicating Canada as their primary country of practice were directed to a question regarding the Province or Territory or State of their primary practice whereas respondents indicating the United States as their primary country of practice were directed to a question regarding the State of their primary practice.
11. Respondents were able to review and change their answers through use of back button on the survey.
12. The number of screens on which survey questions were displayed varied based on the size of the screen being used by respondents. However, the survey was contained within 5 pages on Survey Monkey (SurveyMonkey, Palo Alto, California, USA).
13. Survey Monkey tracked each person who accessed the survey.
14. The responses to questions pertaining to the inclusion/exclusion criteria were used to filter responses to ensure that only data of those meeting the inclusion/exclusion criteria.
15. A log file analysis was not used to identify multiple survey responses.
